# Supplementary material
Source: Springer Nature journal article supplement (https://www.springermedizin.de/resource/supplementary/12889_2013_6474_MOESM3_ESM.pdf/9498296)
Supplement: MOESM3 [file 9498296]

# PRESENT SITUATION-2013

Initial pathway-2008

Modified pathway-2013

## INPUT

- Mobile supervision team (clinician and counsellor)

- Permanent presence of counsellors in most clinics
- Resources for trainings and meetings (Transport, incentives, etc.)
- Lobby MoH to accept the CAG model

## PROCESS

- CAG eligibility criteria
- Rotation system for drug collection
- 6-monthly clinical consultation & CD4 control

- Flexible application of medical CAG eligibility criteria
- Group established CAG entry requirements
- Mutual adherence support
- Social control through 'Code of conduct'
- CAG members participate in HIV related activities in clinics and community
- Often parallel patient flow for CAG members in clinics bypassing clinician
- Problems with group formation, rotationsystem and relationships in groups
- Counsellor key role to form and monitor groups

## OUTPUT

- Better access to drugs
- Improved retention in care

- Creation of 'Protective, environment'
- Empowerment of patients
- Improved quality of care provided that supervision is in place
- Decreased stigma
- Improved health seeking behaviour
- Better HIV awareness
- Risk to exclude most vulnerable target groups
- Risk of inequity towards patients not in CAG
